# Supplementary material for: ZnO Nanostructures Doped with Various Chloride Ion Concentrations for Efficient Photocatalytic Degradation of Methylene Blue in Alkaline and Acidic Media
Source: MDPI journal article supplement (doi:10.3390/molecules27248726), 2022-12-09
Supplement: s1 [file s1]

# ZnO Nanostructures Doped with Various Chloride Ion Concentrations for Efficient Photocatalytic Degradation of Methylene Blue in Alkaline and Acidic Media

Razan A. Alshgari <sup>1</sup>, Zaheer Ahmed Ujjan <sup>2,\*</sup>, Aqeel Ahmed Shah <sup>3</sup>, Muhammad Ali Bhatti <sup>4</sup>, Aneela Tahira <sup>5</sup>, Nek Muhammad Shaikh <sup>2</sup>, Susheel Kumar <sup>2</sup>, Mazhar Hussain Ibupoto <sup>6</sup>, Amal Elhawary <sup>7</sup>, Ayman Nafady <sup>1</sup>, Brigitte Vigolo <sup>8</sup> and Zaffar Hussain Ibhipoto <sup>9,\*</sup>

- <sup>1</sup> Department of Chemistry, College of Science, King Saud University, Riyadh 11451, Saudi Arabia
  - <sup>2</sup> Institute of Physics, University of Sindh Jamshoro, Jamshoro 76080, Pakistan
  - <sup>3</sup> Department of Metallurgy, NED University of Engineering and Technology Karachi, Karachi 75270, Pakistan
  - <sup>4</sup> Institute of Environmental Sciences, University of Sindh Jamshoro, Jamshoro 76080, Pakistan
  - <sup>5</sup> Institute of Chemistry, Shah Abdul Latif University Khairpur Mirs, Khairpur Mirs 66020, Pakistan
  - <sup>6</sup> Department of Zoology, Shah Abdul Latif University Khairpur Mirs, Khairpur Mirs 66020, Pakistan
  - <sup>7</sup> Department of Chemistry and physics, Faculty of Education, Alexandria University, Alexandria 21500, Egypt
  - <sup>8</sup> College of Natural Resources and Sciences, Jean Lamour Institute, Université de Lorraine, F-54000 Nancy, France
  - <sup>9</sup> Institute of Chemistry, University of Sindh Jamshoro, Jamshoro 76080, Pakistan
- \* Correspondence: zaheer.ujjan@scholars.usindh.edu.pk (Z.A.U.); zaffar.ibhupoto@usindh.edu.pk (Z.H.I.)

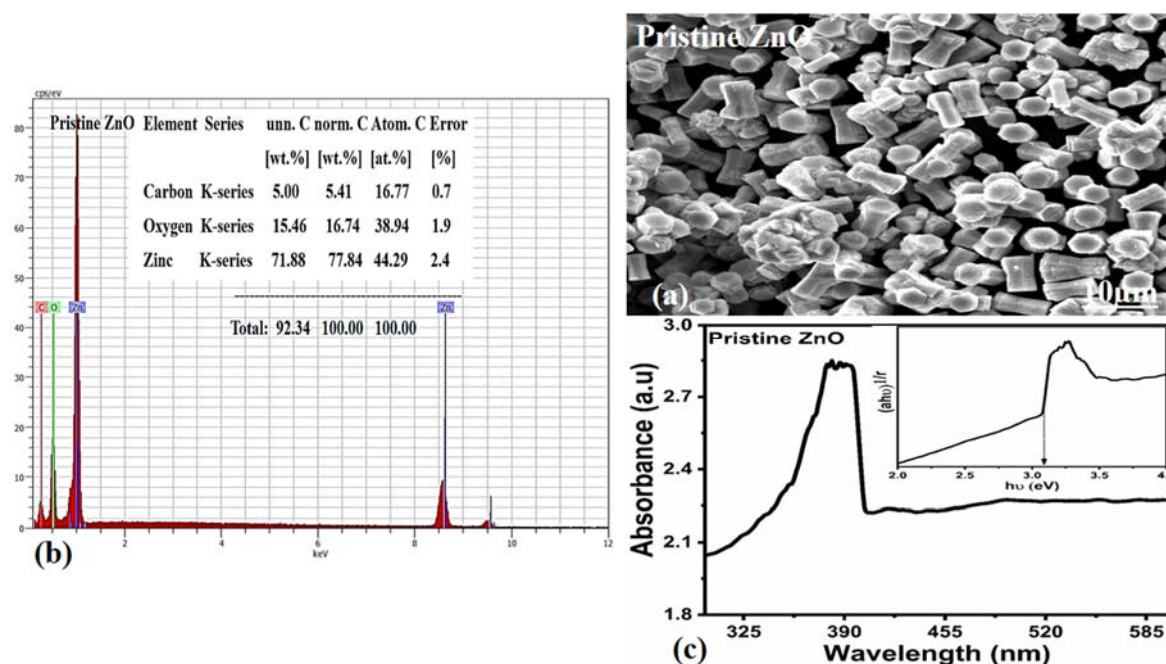

**Figure S1.** SEM image of pure ZnO, (b) EDX of pure ZnO, (c) UV-visible absorbance spectrum of pure ZnO, inset show the optical band gap.
